# Supplementary material for: DSCAM/PAK1 pathway suppression reverses neurogenesis deficits in iPSC-derived cerebral organoids from patients with Down syndrome
Source: JCI journal article supplement (doi:10.1172/jci135763), 2021-05-04
Supplement: sd1 [file 1]

## Supplemental Information

### Suppressing the DSCAM/PAK1 pathway reverses neurogenesis deficits in Down Syndrome patient iPSC-derived cerebral organoids.

Xiao-Yan Tang<sup>1</sup>, Lei Xu<sup>1</sup>, Jingshen Wang<sup>2</sup>, Yuan Hong<sup>1</sup>, Yuanyuan Wang<sup>2</sup>, Qian Zhu<sup>1</sup>, Da Wang<sup>1</sup>,  
Xin-Yue Zhang<sup>1</sup>, Chun-Yue Liu<sup>2</sup>, Kai-Heng Fang<sup>1</sup>, Xiao Han<sup>1</sup>, Shihua Wang<sup>3</sup>, Xin Wang<sup>3</sup>, Min  
Xu<sup>1</sup>, Anita Bhattacharyya<sup>4,5</sup>, Xing Guo<sup>2, 6\*</sup>, Mingyan Lin<sup>2\*</sup>, Yan Liu<sup>1\*</sup>

<sup>1</sup> Institute for Stem Cell and Neural Regeneration, State Key Laboratory of Reproductive Medicine,  
School of Pharmacy, Nanjing Medical University, Nanjing, China, 211166

<sup>2</sup> Department of Neurobiology, School of Basic Medical Sciences, Nanjing Medical University,  
Nanjing, Jiangsu 211166, China

<sup>3</sup> State Key Laboratory of Cellular Stress Biology, Fujian Provincial Key Laboratory of  
Neurodegenerative Disease and Ageing Research, Institute of Neuroscience, School of Medicine,  
Xiamen University, Xiamen, China, 361102

<sup>4</sup> Waisman Center, University of Wisconsin, Madison, WI, USA, 53705

<sup>5</sup> Department of Cell and Regenerative Biology and Neuroscience University of Wisconsin,  
Madison, WI, USA, 53705

<sup>6</sup> Department of Endocrinology, Sir Run Run Hospital, Nanjing Medical University, Nanjing,  
Jiangsu, China

\*Correspondence: yanliu@njmu.edu.cn (Y. Liu), linmingyan@njmu.edu.cn (M. Lin), and  
guox@njmu.edu.cn (X. Guo)

## Supplemental Figures and Figure legends

Supplemental Figure 1

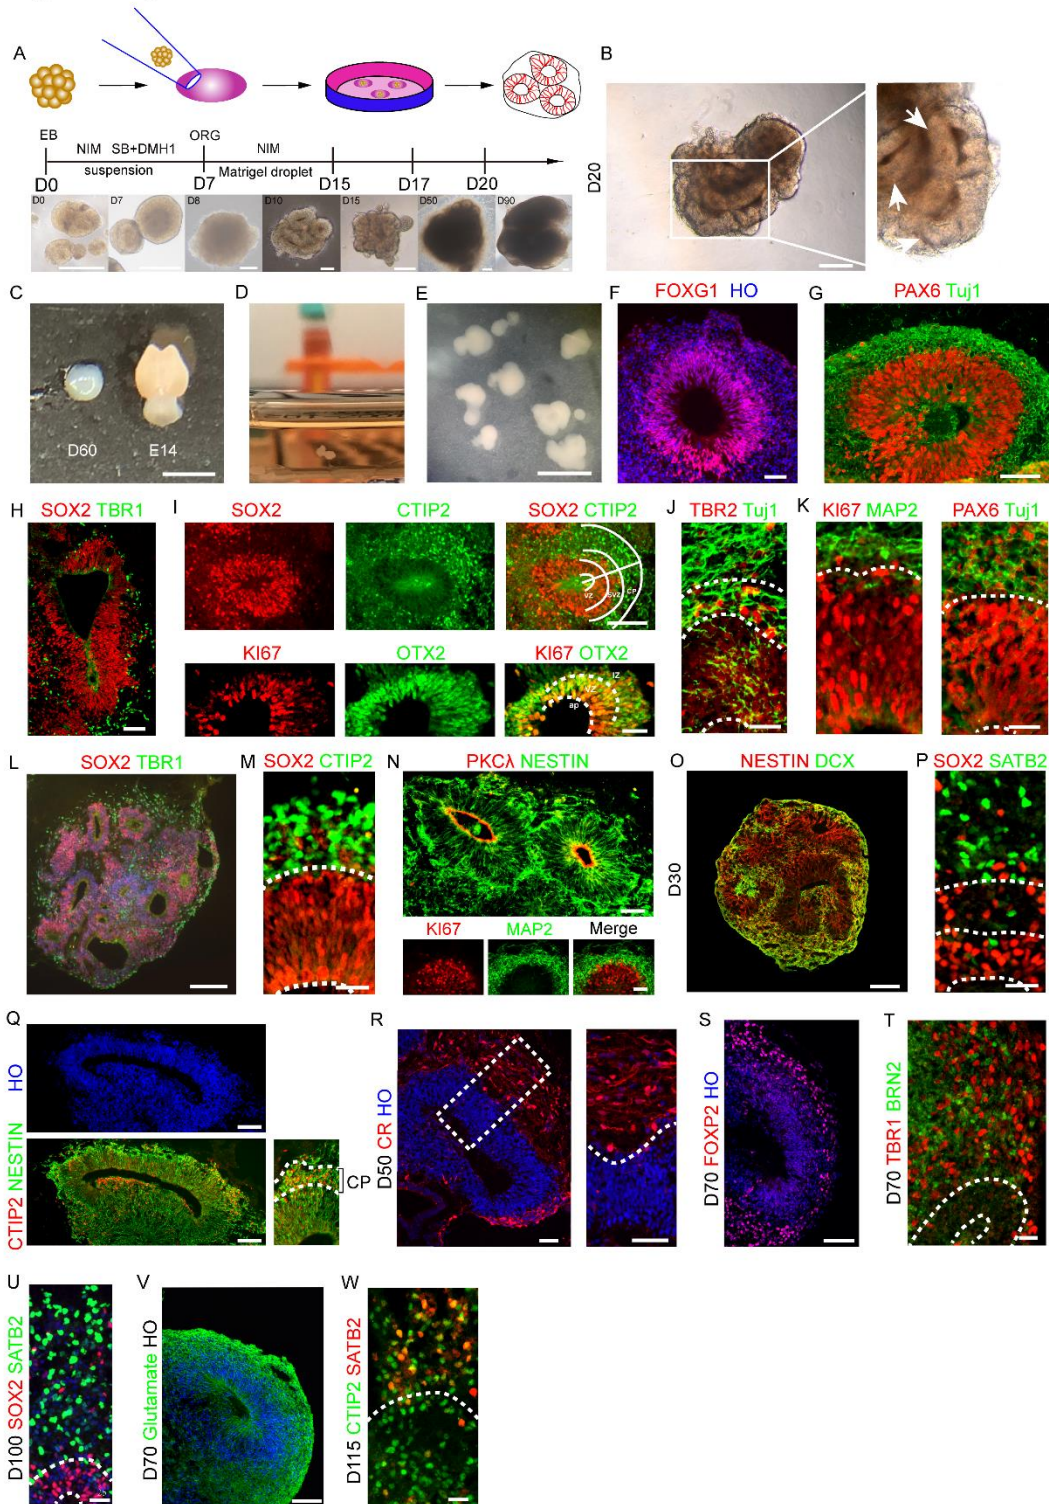

**Supplemental Figure 1. Generation of human cerebral organoids (hCOs).** (A) Schematic diagram of the organoid generated from hPSCs and representative images at each stage. Scale bars, 250  $\mu\text{m}$ . (B) Bright-field images of forebrain organoids at 20 days after initiation of differentiation showing several optically clear neuroepithelial bud outgrowths (white arrows) surrounding a lumen.

Scale bar, 250  $\mu\text{m}$ . **(C)** Comparison size of a day 60 cerebral organoid and a dissected E14 mouse brain. Scale bar, 5 mm. **(D)** Representative image of forebrain organoids after 60 days of differentiation. **(E)** Representative image of forebrain organoids captured by stereoscopy after 60 days of differentiation. Scale bar, 2 mm. **(F)** Immunostaining for the forebrain marker FOXG1 after 30 days of differentiation. Scale bar, 50  $\mu\text{m}$ . **(G)** Immunofluorescence of the dorsal forebrain marker PAX6 and the neuronal marker TUJ1 after 30 days of differentiation. Scale bar, 100  $\mu\text{m}$ . **(H)** Immunostaining for the neural progenitor marker SOX2 (red) and the layer VI neuron marker TBR1, showing ventricle-like structures. Scale bar, 100  $\mu\text{m}$ . **(I)** Sample images of immunostaining for the progenitor marker SOX2, the deep-layer neuron marker CTIP2, proliferative marker Ki67 and forebrain progenitor marker OTX2 after 30 days of differentiation. Scale bar, 50  $\mu\text{m}$ . **(J)** Immunofluorescence for the intermediate progenitor marker TBR2 and TUJ1 after 30 days of differentiation. Scale bar, 100  $\mu\text{m}$ . **(K)** Sample images of immunostaining for Ki67, PAX6 and neuronal marker MAP2/TUJ1. Scale bar, 25  $\mu\text{m}$ . **(L)** Representative sections of whole organoids stained for SOX2 (red) and TBR1 after 30 days of differentiation. Scale bar, 100  $\mu\text{m}$ . **(M)** Staining for SOX2 and CTIP2 expression after 30 days of differentiation. Scale bar, 50  $\mu\text{m}$ . **(N)** Immunohistochemical staining for the adherent junction marker PKC $\lambda$  (red, above), neural stem cell marker NESTIN (green, above), proliferation marker Ki67 (red, below) and neuronal marker MAP2 (green, below) after 30 days of differentiation. Scale bars, 50  $\mu\text{m}$ . **(O)** A representative full-sized organoid (30 days) that labelled with NESTIN (red) and DCX. Scale bar, 100  $\mu\text{m}$ . **(P)** Staining for SOX2 and the upper-layer neuron marker SATB2 after 50 days of differentiation, revealing typical VZ-, SVZ- and CP-like regions. Scale bar, 50  $\mu\text{m}$ . **(Q)** Sample images of immunostaining for early-born neuron marker CTIP2 (red) and NESTIN (green) at 40 days. Scale bars, 100 $\mu\text{m}$ . **(R)** Calretinin (CR, red) staining revealing CP-like cells along the basal surface of cortical tissue. Scale bar, 50  $\mu\text{m}$ . **(S)** Immunofluorescence of the early-born neuron marker FOXP2. Scale bar, 100  $\mu\text{m}$ . **(T)** Immunofluorescence of TBR1 (red) and the late-born neuron marker BRN2 at 70 days. Scale bar, 25  $\mu\text{m}$ . **(U)** Immunohistochemical staining for SOX2 and SATB2 after 100 days of differentiation, revealing a decreased VZ-like region. Scale bar, 25  $\mu\text{m}$ . **(V)** Immunofluorescence of the glutamatergic neuron marker glutamate after 70 days of differentiation. Scale bar, 100  $\mu\text{m}$ . **(W)** Representative images of the CP-like region in forebrain organoids with immunofluorescence identifying CTIP2 and the superficial layer neuron marker SATB2 (red). Scale bar, 25  $\mu\text{m}$ .

Supplemental Figure 2

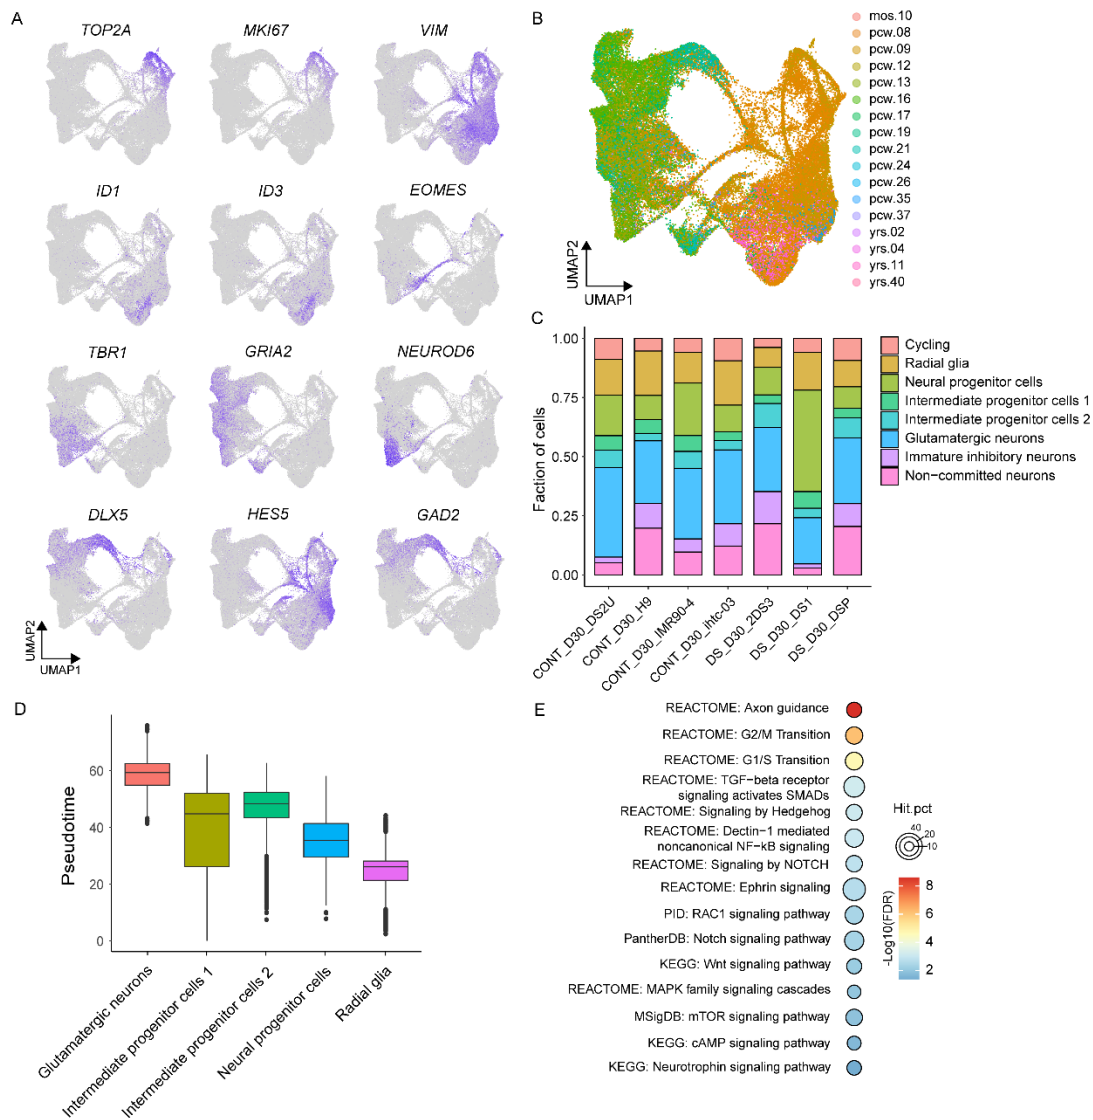

**Supplemental Figure 2. Single-cell RNA-seq analysis of trisomy 21 and euploid cerebral organoids.** (A) UMAP visualization of gene expression of canonical marker genes in the cerebral organoids at days 30 and 70 of in vitro differentiation. Cycling: *TOP2A*, *MKI67*; radial glial cells: *VIM*; NPCs: *ID1*, *ID3*; intermediate progenitor cells: *EOMES*; glutamatergic neurons: *NEUROD6*, *TBR1*; immature inhibitory neurons: *DLX5*, *GAD2*; neuronal growth cone: *GRIA2*; and neurogenesis and gliogenesis: *HES5*. The expression is depicted from grey (low) to blue (high). (B) Temporal mapping of cell types in trisomy 21 and euploid organoids to BrainSpan. Most neural stem cells and NPCs are coloured orange (pcw 08-09), while most neurons are coloured green (pcw 12 -pcw 13). (C) Cell compositions in each group. (D) Boxplot showing the distribution of pseudotime within each cell type. (E) Pathway enrichment analysis of DEGs between trisomy 21 and euploid organoids. Scale indicates the FDR, and circle size indicates the percentage of all genes enriched in selected pathways.

Supplemental Figure 3

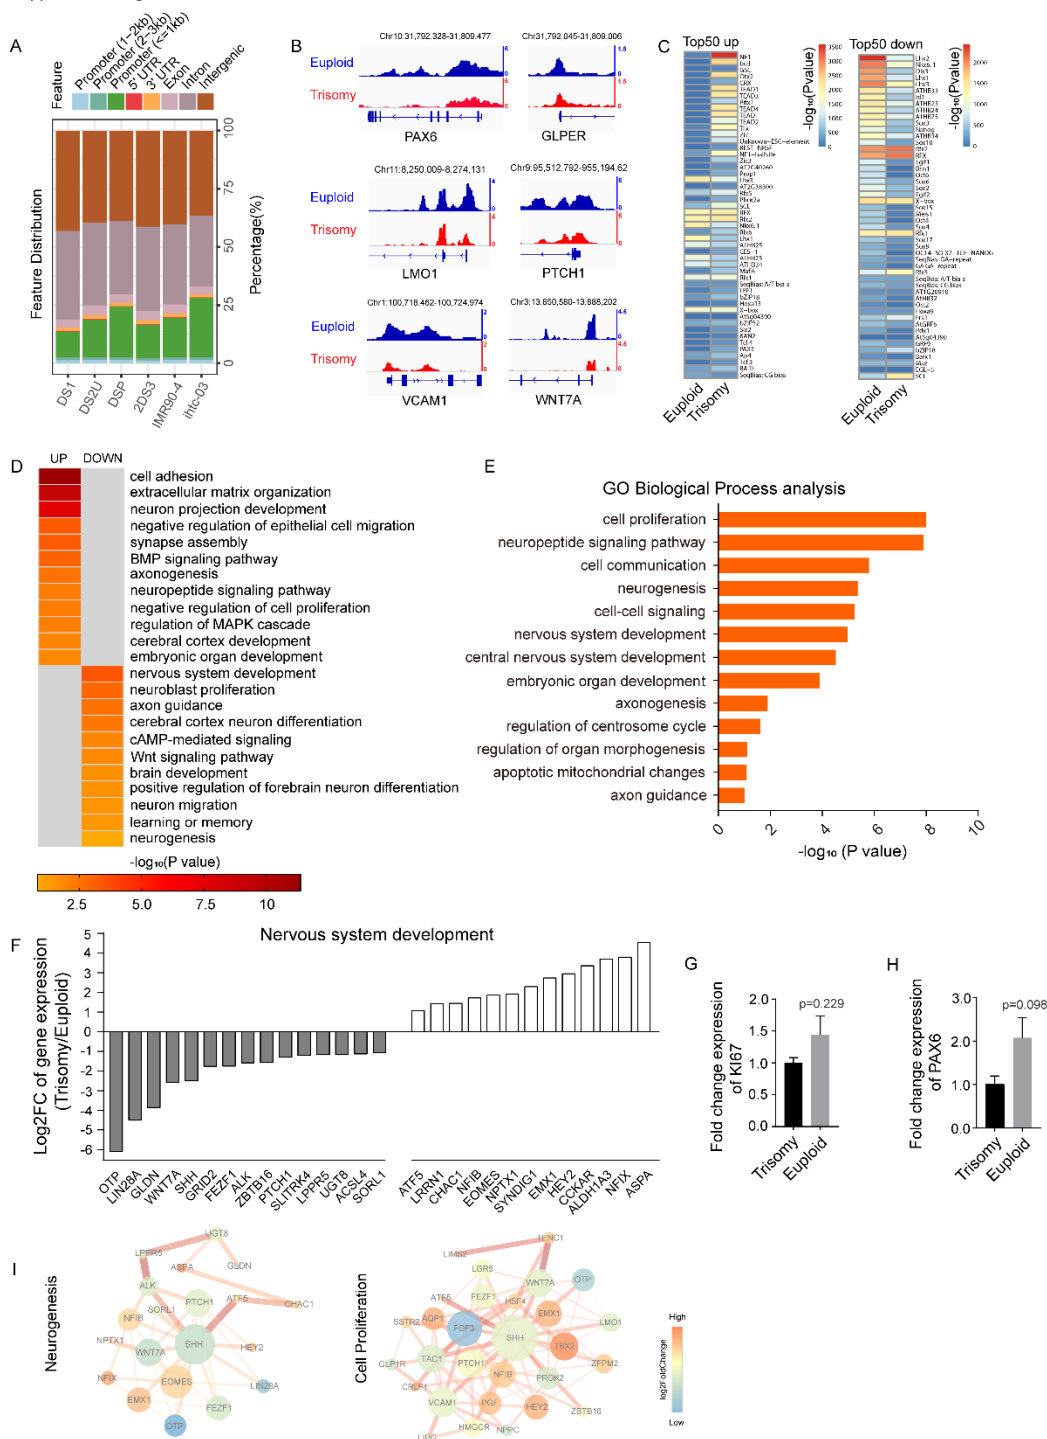

**Supplemental Figure 3. Genome-wide analysis of chromatin accessibility and gene expression in trisomy 21 and euploid cerebral organoids.** (A) Genome annotation of all the peaks in the trisomy 21 and euploid organoids. (B) ATAC-seq read distribution around the transcription start site (TSS) in the trisomy 21 and euploid organoids. (C) Heatmap showing the significance of 100 transcription factor motifs enriched in trisomy 21- and euploid-accessible loci. Motifs are sorted from the loci with increased/decreased accessibility in trisomy 21 organoids compared to those in euploid organoids. (D) Heatmap of GO biological processes enriched in dOCRs between trisomy 21 organoids and euploid organoids. (E) Seventeen enriched terms for dysregulated

genes during trisomy 21 organoid differentiation were identified using GO analysis. (F) Representative genes associated with nervous system development were differentially expressed in trisomy 21 organoids. (G-H) RNA-seq analysis of Ki67 and PAX6 expression. (I) The top 20 gene interaction networks were involved in neurogenesis, and 29 gene interaction networks were involved in cell proliferation.

Supplemental Figure 4

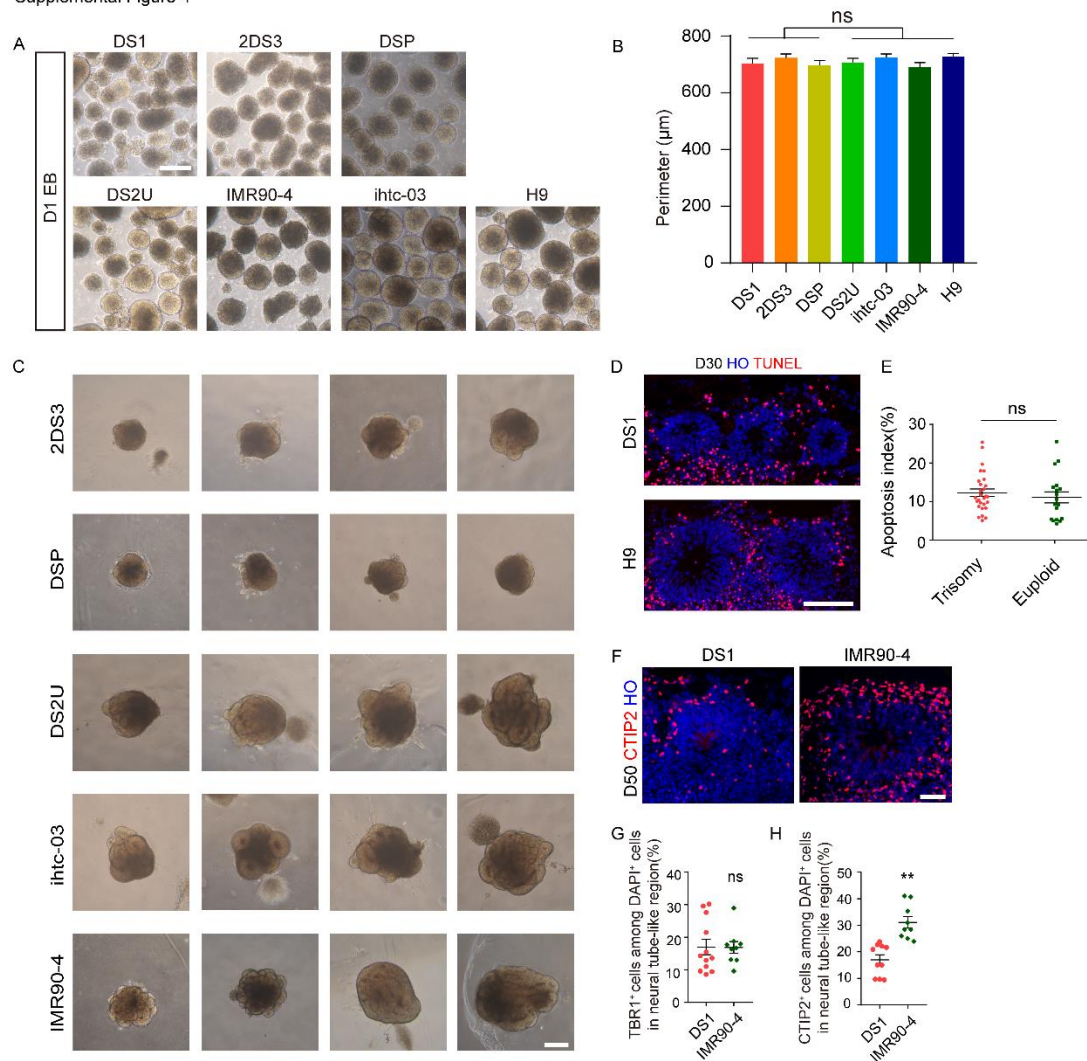

**Supplemental Figure 4. Characterization of organoids from trisomy and euploid organoids, related to Figure 3.** (A) Bright-field microscopy images of trisomy 21 and euploid EBs at day 1. Scale bar, 250  $\mu\text{m}$ . (B) Quantification of perimeter at day 1. At least 50 EBs were analysed for each cell line,  $n \geq 3$  for independent experiments. Error bars,  $\pm$  SEM; one-way ANOVA followed by Dunnett's multiple comparisons test. (C) Bright-field images of trisomy 21 and euploid organoids at different developmental time points. Scale bar, 250  $\mu\text{m}$ . (D) Representative imaging of TUNEL staining in day 30 organoid sections. Scale bar, 100  $\mu\text{m}$ . (E) Comparison of the apoptosis index in the trisomy 21 and euploid groups.  $n=18$  to 28 neural tube-like regions in at least 6 organoids per cell line were counted. Error bars,  $\pm$  SEM; Student's t test. (F) Decreased mature CTIP2<sup>+</sup> neurons at 50 days in trisomy 21 organoids compared to euploid organoids. Scale bar, 50  $\mu\text{m}$ . (G-H) Quantification of the proportion of TBR1<sup>+</sup> and CTIP2<sup>+</sup> cells in trisomy 21 and euploid organoids

after 50 days of differentiation. n=9 to 12 neural tube-like regions in at least 5 organoids per cell line were counted. Error bars,  $\pm$ SEM; Student's t test.

Supplemental Figure 5

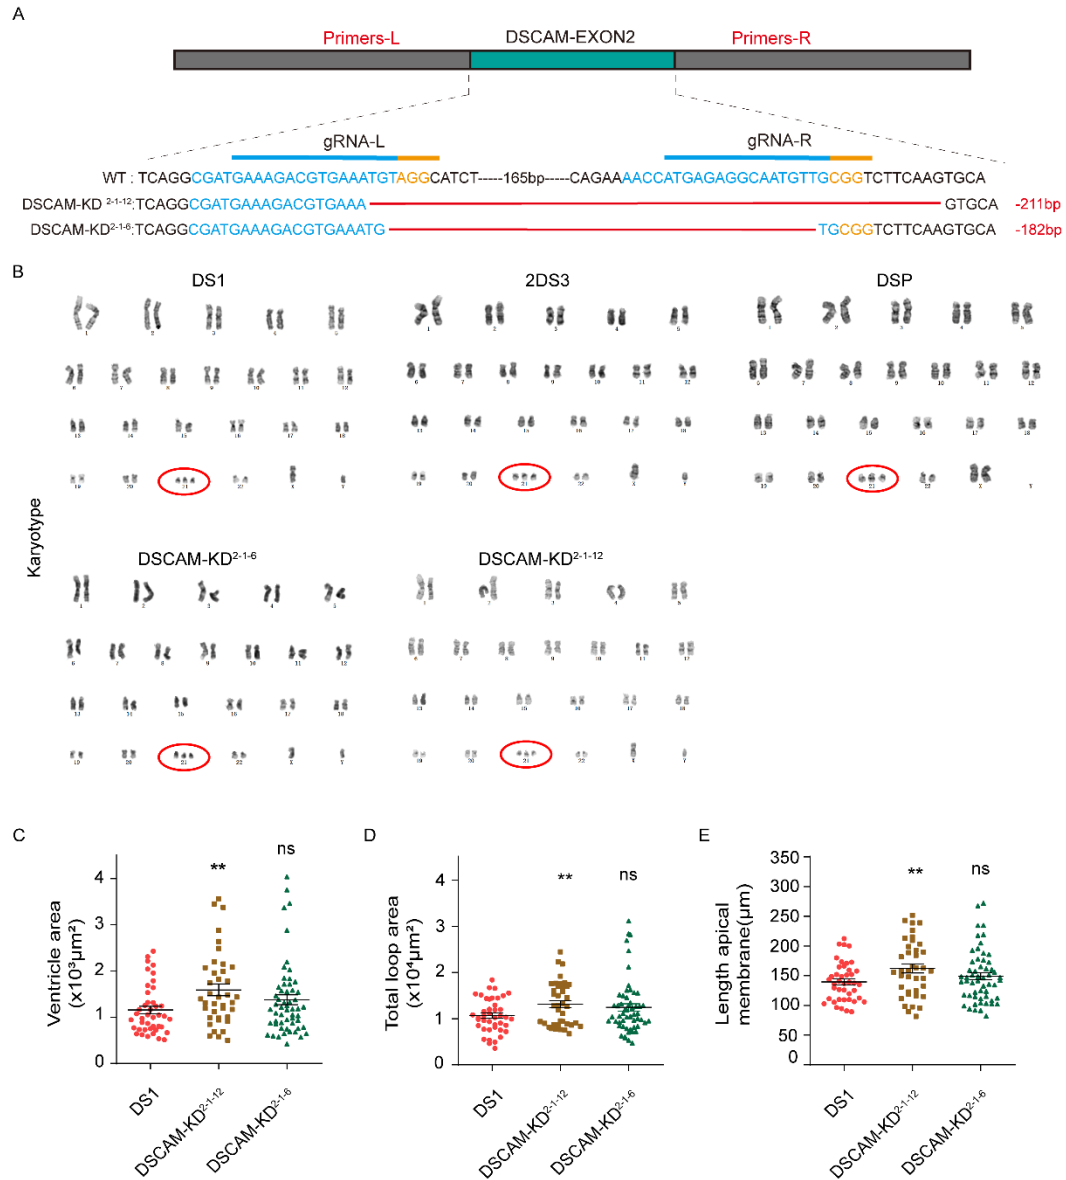

**Supplemental Figure 5. Deletion of DSCAM using CRISPR/Cas9 genome editing in DS related to Figure 5 and Figure 6. (A) Characterization of the deletion break regions by sequencing. (B) Karyotype analysis of trisomy 21 and DSCAM-KD organoids. (C-E) Quantitative assessment of multiple parameters in neuroepithelial loops of trisomy- (DS1 n=15) and DSCAM-KD- (DSCAM-KD2-1-12 n=16; DSCAM-KD2-1-6 n=18) organoids after day 30 of differentiation. Shown are the ventricle-like area (b), total loop area (c), and length apical membrane (d).**

Supplemental Figure 6

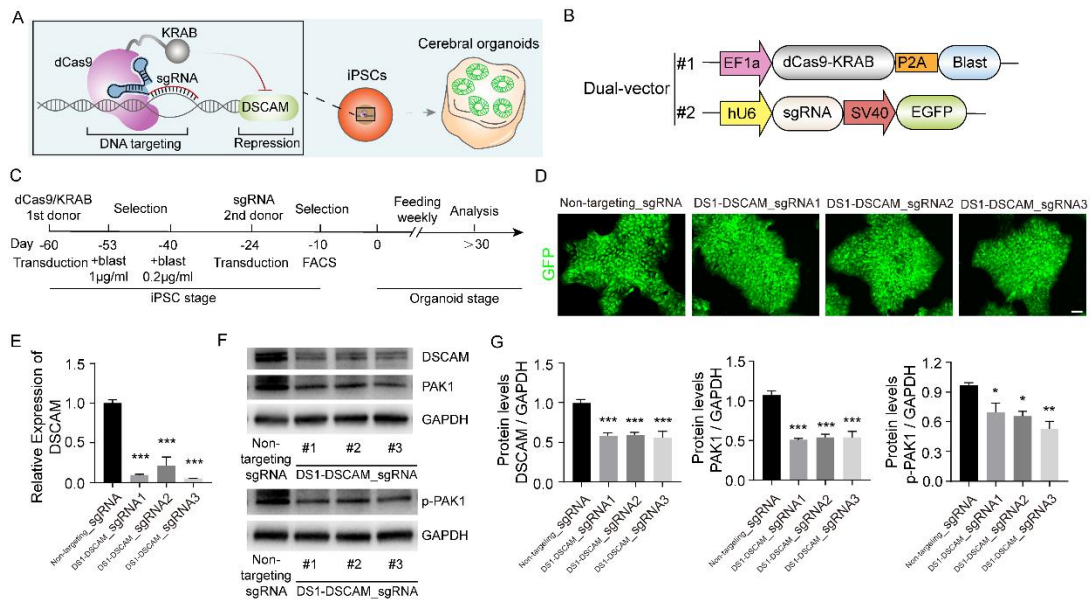

**Supplemental Figure 6. CRISPRi-based inactivation of DSCAM in trisomy 21 organoids.**

(A) Diagram of the CRISPR interference (CRISPRi) system in trisomy 21 cerebral organoids. (B) Schematic representation of the dual-vector strategies for DSCAM-targeting CRISPRi. (C) Timeline for sgRNA transduction, selection and functional analysis of CRISPRi-DSCAM iPSCs. (D) CRISPRi experiments in human iPSCs. Lentiviruses generated from the CRISPRi dual-vector were used for DSCAM knockdown in human iPSCs. Scale bar, 50 µm. (E) qPCR analysis of mRNA in organoids infected with DSCAM targeting CRISPRi lentivirus. The DSCAM expression in the control group was normalized to 1.  $n \geq 3$  for independent experiments. Error bars,  $\pm$  SEM; \*\*\* $P < 0.001$ ; one-way ANOVA followed by Dunnett's multiple comparisons test. (F-G) Effects of DSCAM knockdown on the DSCAM-PAK1 pathway in trisomy 21 organoids. Shown are immunoblot analysis (F) and quantification (G) of DSCAM, PAK1 and p-PAK1 expression in trisomy 21 organoids infected with DSCAM sgRNA and non-specific control sgRNA at 30 days. ( $n \geq 3$  for independent experiments; error bars,  $\pm$  SEM; \* $P < 0.05$ , \*\* $P < 0.01$ , \*\*\* $P < 0.001$ ; one-way ANOVA followed by Dunnett's multiple comparisons test).



Supplemental Figure 7

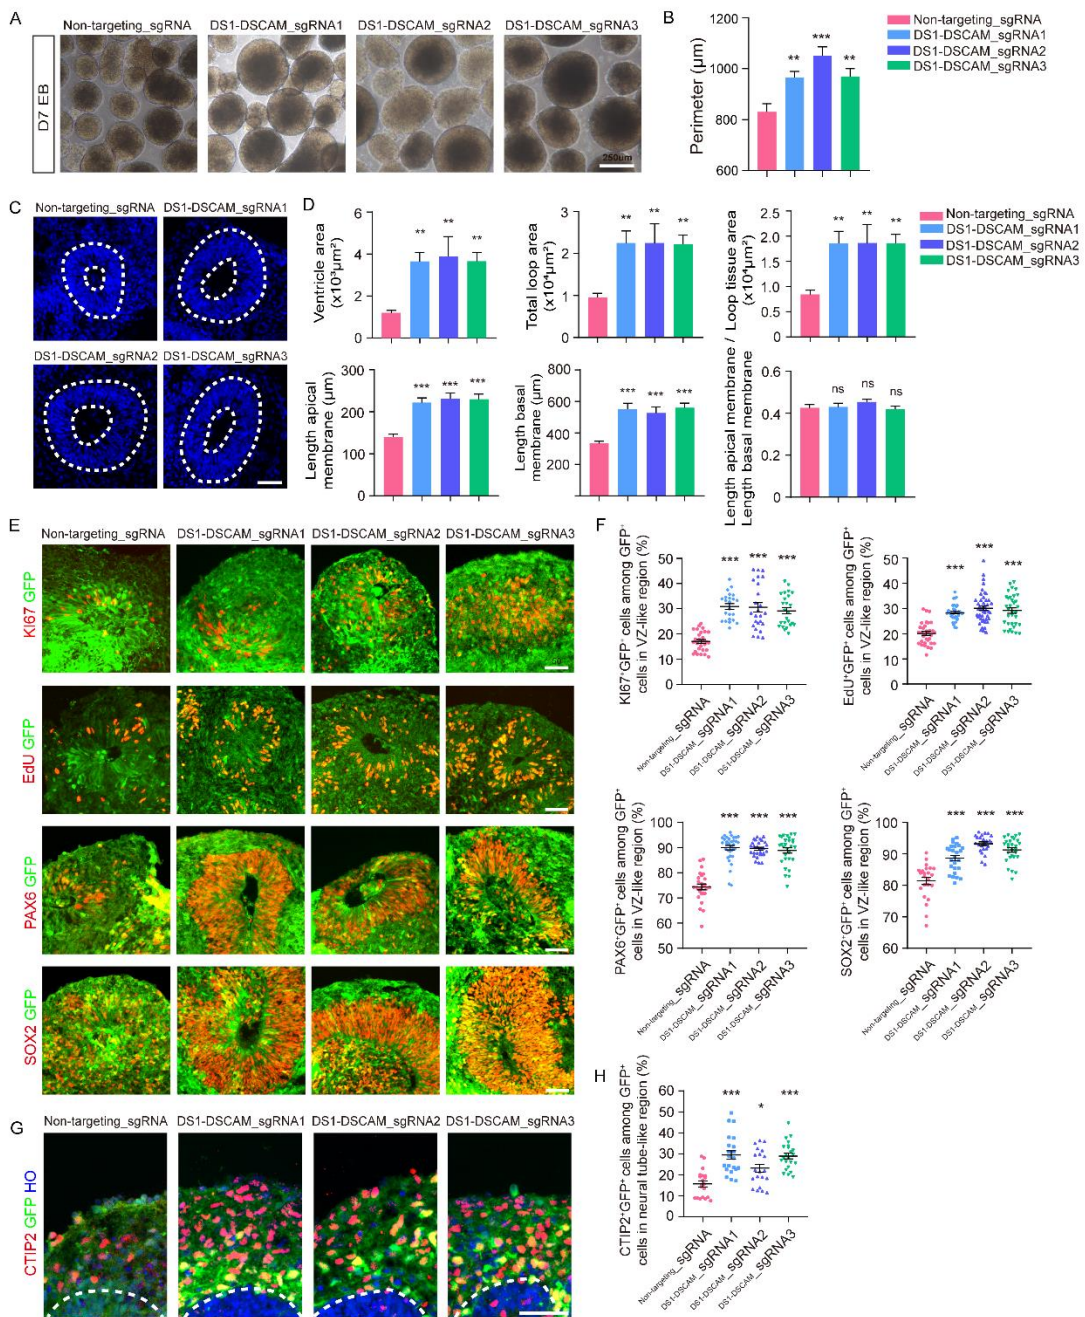

**Supplemental Figure 7. CRISPRi-based inactivation of DSCAM ameliorates neurogenesis impairments in trisomy 21 organoids.** (A) Bright-field images of embryonic bodies infected with DSCAM sgRNA and non-specific control sgRNA at day 7. (B) Quantification of the perimeter length of the EBs at day 7. At least 45 EBs were analysed for each cell line,  $n \geq 3$  for independent experiments; error bars.  $\pm$  SEM. \* $P < 0.05$ , \*\* $P < 0.01$ , \*\*\* $P < 0.001$ ; one-way ANOVA followed by Dunnett's multiple comparisons test. (C) Representative Hoechst staining in neuroepithelial loops of trisomy 21 organoids infected with DSCAM sgRNA and non-specific control sgRNA, which displayed the method of quantitation of the different parameters. (D) Quantification of a series of parameters in the neuroepithelial loops of trisomy 21 organoids infected with DSCAM sgRNA and non-specific control sgRNA.  $n \geq 16$  organoids from three independent biological replicate

experiments were analysed for each cell line. Error bars,  $\pm$  SEM. \* $P < 0.05$ , \*\* $P < 0.01$ , \*\*\* $P < 0.001$ ; one-way ANOVA followed by Dunnett's multiple comparisons test. (E) Effects of DSCAM knockdown on cell proliferation in trisomy 21 organoids. Representative images of trisomy 21 organoids infected with DSCAM sgRNA or non-specific control sgRNA at 30 days are shown. Ki67, EdU, PAX6, SOX2 are shown in red. Scale bar, 50  $\mu$ m. (F) Quantification of the proportion of GFP<sup>+</sup> cells expressing Ki67, EdU, PAX6 and SOX2 in trisomy 21 organoids infected with DSCAM sgRNA or non-specific control sgRNA at 30 days. (n=23 to 45 VZ-like regions in at least 6 organoids per cell line were counted; error bars,  $\pm$  SEM. \* $P < 0.05$ , \*\* $P < 0.01$ , \*\*\* $P < 0.001$ ; one-way ANOVA followed by Dunnett's multiple comparisons test). (G) Immunostaining for the deep-layer neuron marker CTIP2 along the neural tube-like region of 30-day trisomy 21 organoids infected with DSCAM sgRNA or non-specific control sgRNA. Scale bar, 50  $\mu$ m. (H) Quantification of the percentage of GFP<sup>+</sup> cells expressing CTIP2 in trisomy 21 organoids infected with DSCAM sgRNA or non-specific control sgRNA at 50 days after differentiation. n=20 to 24 neural tube-like regions in at least 5 organoids per cell line were counted. Error bars,  $\pm$  SEM. \* $P < 0.05$ , \*\* $P < 0.01$ , \*\*\* $P < 0.001$ ; one-way ANOVA followed by Dunnett's multiple comparisons test.

Supplemental Figure 8

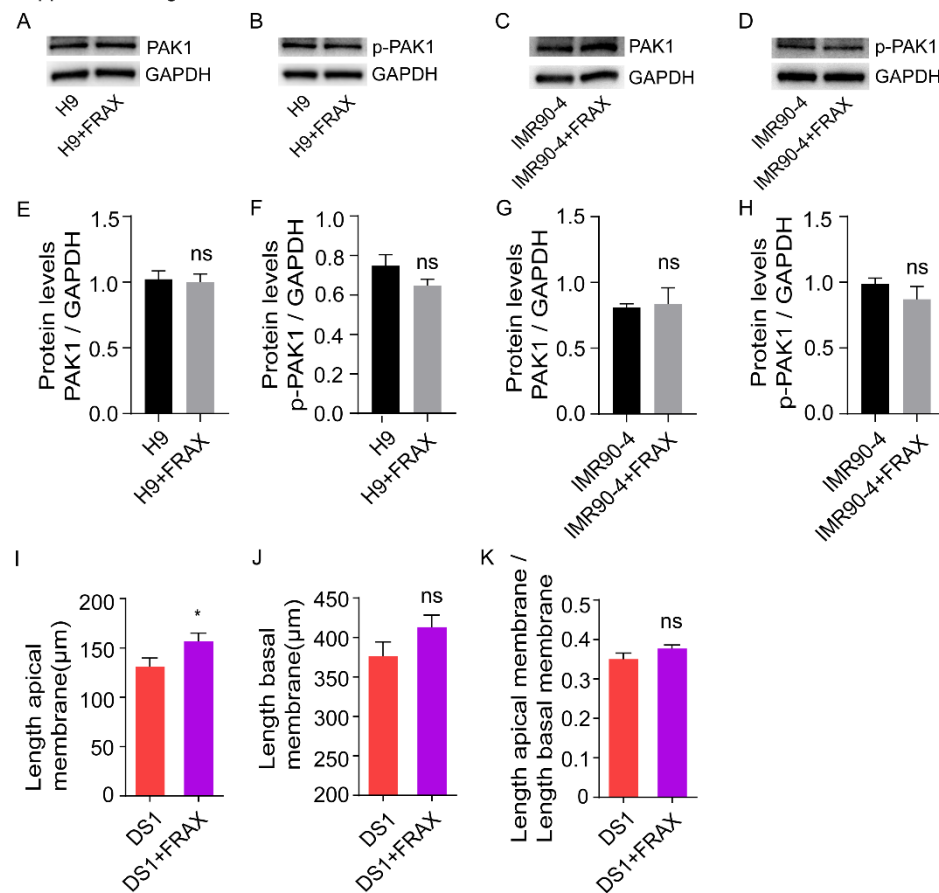

**Supplemental Figure 8. Analysis of the effects of a PAK1 inhibitor on euploid organoids and multiple parameters of neuroepithelial loops in trisomy 21 and rescued organoids (related to Figure 8).** (A-D) Detection of PAK1 and p-PAK1 levels in euploid organoids at 30 days after treatment with FRAX486 as measured by western blot. (E-H) Western blot analysis of PAK1 and p-PAK1 in euploid organoids at 30 days after treatment with FRAX486. n  $\geq$  3 for independent

experiments. Error bars,  $\pm$  SEM; Student's t test. **(I-K)** Quantitation of length apical membrane (I), length basal membrane (J) and length apical membrane/length basal membrane (K) in neuroepithelial loops of trisomy 21 and rescued organoids.  $n \geq 10$  organoids from three independent biological replicate experiments were analysed for each cell line. Error bars,  $\pm$  SEM; \* $P < 0.05$ ; Student's t test.

Supplemental Table 1

Basic information of different iPSC lines in this study

| hPSC line name             | Karyotype     | Source, gender, age        |
|----------------------------|---------------|----------------------------|
| DS1                        | Trisomy 21    | AG05397, male, 1 year      |
| 2DS3                       | Trisomy 21    | GM02504, male, 1 month     |
| DSP                        | Trisomy 21    | WC-24-02, female, 25 years |
| DS2U                       | Euploid       | AG05397, male, 1 year      |
| IMR90-4                    | Euploid       | CCL-186, female            |
| H9                         | Euploid       | WA09, female               |
| ihtc-03                    | Euploid       | Female, 28 years           |
| DSCAM-KD <sup>2-1-12</sup> | Trisomy 21 KD | AG05397, male, 1 year      |
| DSCAM-KD <sup>2-1-6</sup>  | Trisomy 21 KD | AG05397, male, 1 year      |

Supplemental Table 2

Antibodies used in this study including suppliers and working dilutions.

| Antibody      | Isotype    | Dilution | Source                     | Cat.NO.   |
|---------------|------------|----------|----------------------------|-----------|
| BRN2          | Mouse IgG  | 1:100    | Santa Cruz                 | SC-393324 |
| Calretinin    | Rabbit IgG | 1:200    | Epitomics                  | 2624-1    |
| CTIP2         | Rat IgG    | 1:300    | abcam                      | ab18465   |
| DCX           | Rabbit IgG | 1:400    | Cell Signaling             | 4604      |
| DSCAM         | Rabbit IgG | 1:500    | abcam                      | Ab85362   |
| DSCAM         | Rabbit IgG | 1:500    | This paper,<br>by ABclonal | N/A       |
| FOXG1         | Rabbit IgG | 1:1000   | abcam                      | ab18259   |
| FOXP2         | Rabbit IgG | 1:1000   | abcam                      | ab16046   |
| GAPDH         | Mouse IgG  | 1:5000   | affinity                   | T0004     |
| Glutamate     | Rabbit IgG | 1:1000   | sigma                      | G6624     |
| KI67          | Rabbit IgG | 1:200    | ZYMED                      | 18-0191   |
| MAP2          | Mouse IgG  | 1:1000   | sigma                      | M1406     |
| NESTIN        | Goat IgG   | 1:1000   | Santa Cruz                 | SC-21247  |
| PAK1          | Mouse IgG  | 1:500    | Santa Cruz                 | SC-166887 |
| P-PAK1        | Rabbit IgG | 1:500    | Santa Cruz                 | 2605s     |
| PAX6          | Rabbit IgG | 1:500    | convance                   | PRB-278P  |
| PKC $\lambda$ | Mouse IgG  | 1:1000   | BD                         | 610207    |

|           |            |        |                              |          |
|-----------|------------|--------|------------------------------|----------|
| SATB2     | Mouse IgG  | 1:100  | abcam                        | ab51502  |
| SOX2      | Goat IgG   | 1:500  | R&D Systems                  | AF2018   |
| SOX1      | Goat IgG   | 1:500  | R&D Systems                  | AF3369   |
| PHH3      | Mouse IgG  | 1:1000 | Cell Signaling<br>Technology | 9706s    |
| pVimentin | Mouse IgG  | 1:1000 | MBL                          | D076-3   |
| TBR1      | Rabbit IgG | 1:1000 | abcam                        | ab31940  |
| TBR2      | Rabbit IgG | 1:200  | abcam                        | Ab23345  |
| TUJ1      | Rabbit IgG | 1:2000 | Covance                      | PRB-435P |
| OTX2      | Rabbit IgG | 1:1000 | R&D Systems                  | AF1979   |
| GFP       | Rabbit IgG | 1:1000 | Chemicon                     | AB3080   |



Supplemental Table 3

Information of single cell RNA sequencing in organoids

|                              | Trisomy                                                                      | Euploid                    |
|------------------------------|------------------------------------------------------------------------------|----------------------------|
| Day 30<br>cerebral organoids | DS1, 2DS3, DSP,<br>DSCAM-KD <sup>2-1-12</sup> ,<br>DSCAM-KD <sup>2-1-6</sup> | DS2U, IMR90-4, ihtc-03, H9 |
| Day 70<br>cerebral organoids | DS1                                                                          | IMR90-4                    |



Supplemental Table 4

Sequences of sgRNAs targeting *DSCAM* in CRISPRi experiment

| sgRNA               | Sequence (5' to 3')  |
|---------------------|----------------------|
| DS1-DSCAM_sgRNA1    | GTGAGCTCATCCCGGGCACT |
| DS1-DSCAM_sgRNA2    | TGAGCTCACGCCCGCGTCTG |
| DS1-DSCAM_sgRNA3    | GGGATCCATGTGACTGAGGC |
| Non-targeting sgRNA | TTCTCCGAACGTGTCACGT  |
